# Supplementary material for: Defining unique clinical hallmarks for immune checkpoint inhibitor-based therapies
Source: PubMed Central journal article supplement — J Immunother Cancer. 2022 Jan 24;10(1):e003024. doi: 10.1136/jitc-2021-003024 (PMC8796265; doi:10.1136/jitc-2021-003024), 2022-01-24
Supplement: jitc-2021-003024supp001.pdf [file jitc-2021-003024supp001.pdf]

## Defining unique clinical hallmarks for immuno-oncology–based therapies

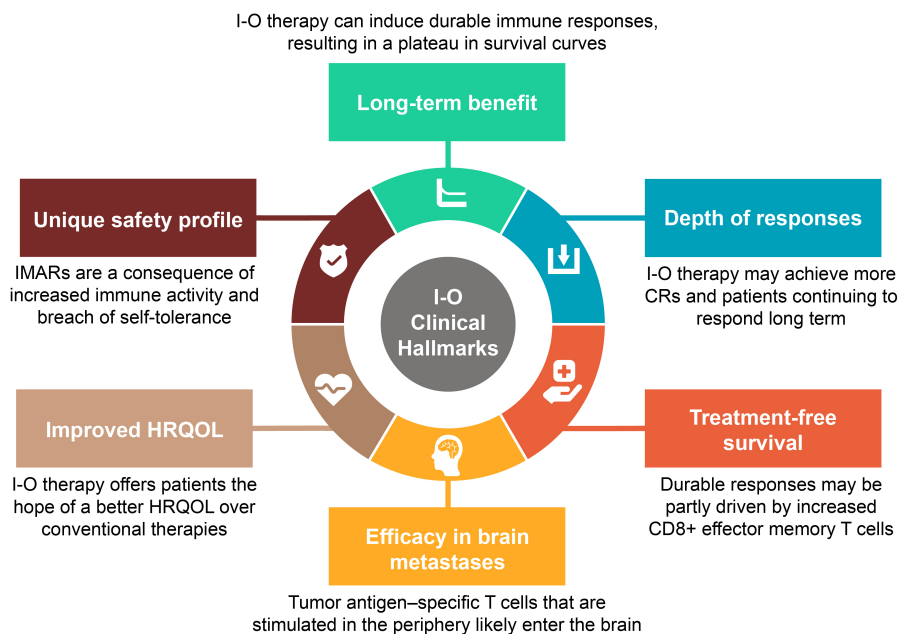

### Authors

Olivier Michielin, Aly-Khan A. Lalani, Caroline Robert, Padmanee Sharma, Solange Peters

### Correspondence

Olivier.Michielin@chuv.ch

### In brief

I-O therapies provide unique hallmarks associated with significantly improved clinical outcomes and a distinct, immune-based safety profile. OS remains the gold standard endpoint; however, investigation of measures inclusive of and beyond long-term survival have evolved, which lead to a greater appreciation of the effectiveness of I-O therapies
